# Supplementary material
Source: PubMed Central journal article supplement (PMC3680765)
Supplement: supp_00324.2012_tableS1.pdf [file supp_00324.2012_tableS1.pdf]

## Additional File

### Protein names and cross references to accession numbers and categories.

| Protein Name                         | NCBI GI Number | Swiss-Prot Access. No. | Functional Categories                                                                                                                                           | Refs.        |
|--------------------------------------|----------------|------------------------|-----------------------------------------------------------------------------------------------------------------------------------------------------------------|--------------|
| 14-3-3 protein $\beta/\alpha$        | gi 4507949     | P31946                 | RSSP, RPPT, Blocks the nuclear translocation of SRPK2                                                                                                           | (40, 48)     |
| 14-3-3 protein $\gamma$              | gi 48428721    | P61981                 | RSSP, RPPT                                                                                                                                                      | (41)         |
| 14-3-3 protein $\zeta/\delta$        | gi 4507953     | P63104                 | RSSP, RPPT                                                                                                                                                      | (20, 66)     |
| 14-3-3 protein $\epsilon$            | gi 51702210    | P62258                 | RSSP, RPPT, Interacts with PKA-P AANAT and SRPK2-P.                                                                                                             | (32)         |
| 14-3-3 protein $\eta$                | gi 4507951     | Q04917                 | RSSP, RPPT, Negatively regulates the kinase activity of PDPK1                                                                                                   | (73)         |
| 14-3-3 protein $\tau/\theta$         | gi 112690      | P27348                 | RSSP, RPPT, Negatively regulates the kinase activity of PDPK1                                                                                                   | (73)         |
| 14-3-3 protein $\sigma$              | gi 5454052     | P31947                 | RSSP, RPPT, When bound to KRT17, regulates protein synthesis and epithelial cell growth by stimulating Akt/mTOR pathway                                         | (36)         |
| 40S ribosomal protein SA             | gi 9845502     | P08865                 | assembly and/or stability of the 40S ribosomal subunit, Interacts with several laminins including at least LAMB1                                                | (90)         |
| 40S ribosomal protein S3             | gi 157 18687   | P23396                 | Identified in a HCV IRES-mediated translation complex                                                                                                           | (106)        |
| ubiquitin-40S ribosomal protein S27a | gi 302393745   | P62979                 | Ribosomal protein S27a is part of the 40S ribosomal subunit                                                                                                     |              |
| 60S ribosomal protein L5             | gi 81175191    | P46777                 | Formation of the 60S ribosomal subunits                                                                                                                         | (71)         |
| 60S ribosomal protein L7             | gi 15431301    | P18124                 | regulatory role in the translation apparatus                                                                                                                    | (35, 71)     |
| 60S ribosomal protein L11            | gi 51702795    | P62913                 | formation of the 60S ribosomal subunits, Promotes nucleolar location of PML                                                                                     | (28)         |
| 60S ribosomal protein L15            | gi 358356407   | Q64211                 | ribosomal protein L15e family                                                                                                                                   |              |
| 60S ribosomal protein L22            | gi 464628      | P35268                 | formation of the 60S ribosomal subunits                                                                                                                         | (25)         |
| 60S ribosomal protein L26            | gi 23396835    | Q9UNX3                 | ribosomal protein L24P family                                                                                                                                   |              |
| EF 1- $\alpha$ 1                     | gi 55584035    | P68104                 | promotes the GTP-dependent binding of aminoacyl-tRNA to the A-site of ribosomes during protein biosynthesis                                                     | (4)          |
| eIF4H                                | gi 18276665    | Q15056                 | Stimulates the RNA helicase activity of EIF4A in the translation initiation complex, Binds weakly mRNA.                                                         | (70, 72)     |
| eIF4A                                | gi 4503529     | P60842                 | unwinds secondary structures in the 5'-UTR of mRNAs to allow efficient binding of the small ribosomal subunit, and subsequent scanning for the initiator codon. | (11, 50, 76) |
| eIF6                                 | gi 3122258     | P56537                 | Binds to the 60S ribosomal subunit and prevents its association with the 40S ribosomal subunit to form the 80S initiation complex in the cytoplasm              | (10)         |
| calreticulin                         | gi 117501      | P27797                 | Component of an EIF2 complex                                                                                                                                    | (12)         |
| Actin, cytoplasmic                   | gi 46397333    | P60709                 | ribonucleoprotein complex containing untranslated mRNAs                                                                                                         | (42)         |
| Tubulin alpha                        | gi 224471855   | Q6PEY2                 | major constituent of microtubules                                                                                                                               |              |
| KRT17                                | gi 547751      | Q04695                 | Regulates protein synthesis and epithelial cell growth through binding to the adapter protein SFN and by stimulating Akt/mTOR pathway                           | (87)         |
| macrophage-capping protein           | gi 63252913    | H9ERB0                 | barbed-end actin filament capping, protein complex assembly                                                                                                     | (15)         |

List of proteins identified by mass spec in shift assays with cross references to NCBI GI number, Swiss-Prot accession number, and functional protein categories (RSSP, regulation of a large spectrum of both general and specialized signaling pathways; RPPT, recognition of a phosphoserine or phosphothreonine motif<sup>2</sup>). Classification into Functional Categories was based on information in the references cited (see reference list in manuscript).
